# Supplementary material
Source: PubMed Central journal article supplement (PMC3931080)
Supplement: supp_M113.528711_jbc.M113.528711-1.pdf [file supp_M113.528711_jbc.M113.528711-1.pdf]

**Characterization of a Novel  $\beta$ -L-Arabinofuranosidase in *Bifidobacterium longum*:  
FUNCTIONAL ELUCIDATION OF A DUF1680 FAMILY MEMBER**

**Kiyotaka Fujita<sup>1</sup>, Yukari Takashi, Eriko Obuchi, Kanefumi Kitahara and Toshihiko  
Suganuma**

From the Faculty of Agriculture, Kagoshima University, Korimoto, Kagoshima 890-0065,  
Japan.

Running head: Characterization of a novel  $\beta$ -L-arabinofuranosidase.

<sup>1</sup>To whom correspondence should be addressed. Tel./Fax: 81-99-285-8639; E-mail:  
kfujita@ms.kagoshima-u.ac.jp.

**SUPPLEMENTARY FIGURE LEGEND**

**Supplementary FIG. S1. Multiple sequence alignment of HypBA1 and its homologs.** The homologous proteins are shown in Fig. 11. The alignment was created with MUSCLE and BoxShade 3.21. Identical residues and conservative substitutions are highlighted in black and dark gray, respectively. Asterisks indicate the residues selected for site-directed mutagenesis. The protein characterized in this study is enclosed in the box.

BL1 242 ---NIFHDLGFYKPTYFQ---AAEPVRDQQTADGHAVR-----VGYLCTGVAHVGRLL  
 BI1 242 ---NIFHDLGFYKPTYFQ---AAEPVRDQQTADGHAVR-----VGYLCTGVAHVGRLL  
 BLL1 242 ---NIFHDLGFYKPTYFQ---AAEPVRDQQTADGHAVR-----VGYLCTGVAHVGRLL  
 BB 214 ---NIFPDLGFYKPTYFQ---AAEPVRDQQTADGHAVR-----VGYLCTGVAHVGRLL  
 BD1 242 ---YIFRDLGFYKPEYFQ---AAEPVRDQQTADGHAVR-----VGYLCTGVAHVGRLL  
 BP1 242 ---YIFRDLGFYKPTYFQ---AAQPVREQQTADGHAVR-----VAYLCTGIAHVARI  
 BC1 242 ---YIFRDLGFYKPTYFQ---AAQPVREQQTADGHAVR-----VAYLCTGIAHVARI  
 BAn 250 GLPAIFPAMETWSHEYTL---TARPIRDQQTAVGHAVR-----VAYLLAGVMQVGRLL  
 BC3 250 ----FYTDLHM-PLKYEYV---QDEPILDKQHAEGHAVR-----LLYLAAAVSKVGRLL  
 BD2 271 DGRNYEPREQ--NYAYYQ---ADKPVTEQTEALGHAVR-----AAYFYSGVADVARI  
 BC2 277 DGRNYEPREQ--NYTYYYQ---ADKPVTEQTEALGHAVR-----AAYFYSGVADVARI  
 BAd 270 DGRNYAPREQ--NYAYYQ---ADKPVTEQTEALGHAVR-----AAYFYAGADVARI  
 BI2 269 ADANYKPNTDPSRYAYHQ---ANKPVTEQDEAVGHAVR-----AGYFYSGIADVARI  
 BL2 269 ADANYKPNTDPNRYAYHQ---ANKPVTEQDEAVGHAVR-----AGYFYSGIADVARI  
 BLL2 269 ADANYKPNTDPNRYAYHQ---ANKPVTEQDEAVGHAVR-----AGYFYSGIADVARI  
 BP2 233 ERYHVMADR-FKDHAIEDPLAQGEDVLTGMHANTQIPK-----VLCWERLIGAI  
 BLL4 337 RSEFLKASAFEDTDKLDNCGAGVDLNNLHANQHHPQ-----FVGYAKDAAMGDADI  
 BLL3 598 KQTVLTAAHLEDETALFQKLANGQDPLNGLHANTTIPKLTGAMQRYVAYTEDEDLYNS-L

\*E322

BL1 288 LGDQG-----LIDTAKREWKNIIVTIRMYVTGAIGSTHV---GESFTYDYDLPN--DTM  
 BI1 288 LGDQG-----LIDTAKREWKNIIVTIRMYVTGAIGSTHV---GESFTYDYDLPN--DTM  
 BLL1 288 LGDQG-----LIDTAKREWKNIIVTIRMYVTGAIGSTHV---GESFTYDYDLPN--DTM  
 BB 260 LGDQG-----LIDTAKREWKNIIVTIRMYVTGAIGSTHV---GESFTYDYDLPN--DTM  
 BD1 288 TGDRC-----LLDAVHRMWNISIVGKRMVVTGAVGSTHV---GESFTYDYDLPN--DTM  
 BP1 288 TGDQG-----LLDAAHREFWNNIVSKRMVVTGAIGSTHV---GESFTYDYDLPN--DTM  
 BC1 288 TGDQG-----LLDAAHREFWNNIVSKRMVVTGAIGSTHV---GESFTYDYDLPN--DTM  
 BAn 299 TNDEG-----LLRTGERLWNNIVHKRMYITGGIGSTHV---GEAFTYDYDLPN--DTM  
 BC3 294 LNDQK-----MLDTAERLWNIIVKRMVITGAVGSCQV---GESFSFDDDLPN--DLV  
 BD2 318 TGEAT-----LLESCETLWRNIVDRKLYITGGIGATHM---GEAFSFDYDLPN--DTA  
 BC2 324 TGEAA-----LLESCETLWRNIVDRKLYITGGIGATHM---GEAFSFDYDLPN--DTA  
 BAd 317 TGDSD-----LLASCERLWRNIVDRKIYITGGIGATHM---GEAFSFDYDLPN--DTA  
 BI2 318 ADDQD-----LADAAERLWRNIVDKKLYVTGGIGGTVD---GEAFSYNYDLPN--DSA  
 BL2 318 ADDQD-----LADAAERLWRNIVDKKLYVTGGIGGTVD---GEAFSYNYDLPN--DSA  
 BLL2 318 ADDQD-----LADAAERLWRNIVDKKLYVTGGIGGTVD---GEAFSYNYDLPN--DSA  
 BP2 280 CNDEQ-----ADAATNTFWDSVVEHRS---VSICAHSV---SEHFHPTDDFSSMIESR  
 BLL4 390 DADARAR---YLKAVEGYWGMIVPGRMYAHGGTGE---GEMWGAHTVAG--DI-  
 BLL3 657 SADERGKLTSLYLKAAQNFEDIIVVKDHTYVNGGNSQSEHFHVAGELWKDA-TQNG--DQN

\*E338

\*E366

BL1 336 YG-----ETCASVAMSMFAQQMLDLEPKGEYADVLEKELFNCSIAGISLDGKQYYYVN  
 BI1 336 YG-----ETCASVAMSMFAQQMLDLEPKGEYADVLEKELFNCSIAGISLDGKQYYYVN  
 BLL1 336 YG-----ETCASVAMSMFAQQMLDLEPKGEYADVLEKELFNCSIAGISLDGKQYYYVN  
 BB 308 YG-----ETCASVAMSMFAQQMLDLEPKGEYADVLEKELFNCSIAGISLDGKQYYYVN  
 BD1 336 YG-----ETCASVCM SMLSRQMLDLEPKGEYADVLERELFNCAIAGISLDGKQYYYVN  
 BP1 336 YG-----ETCASVAMSMFARQMLDLEPNGEYADVLERELFNCAIAGISLDGKQYYYVN  
 BC1 336 YG-----ETCASVAMSMFARQMLDLEPNGEYADVLERELFNCAIAGISLDGKQYYYVN  
 BAn 347 YG-----ESCASVCMCFVARQMLEHELRGEYADVLEKELFNCAIAGIALDGGKFFFYVN  
 BC3 342 YG-----ETCASVAMLFYGKSLMETKPRGSVADVMEKELFNGLVLSGVQLDGTIFYFYVN  
 BD2 366 YS-----ESCAAIATAFFARRMLEIQPKSEYADVME SALYNTTLAGMALDGGKFFFYVN  
 BC2 372 YS-----ESCAAIATAFFARRMLEIQPKSEYADVME SALYNTTLAGMALDGGKFFFYVN  
 BAd 365 YS-----ESCAAIATAFFARRMLEIQPKSEYADVME SALYNTTLAGMALDGGKFFFYVN  
 BI2 366 YS-----ETCAAIATAFFARRMLEIAPKAEYADVME SALYNTTLAGMALDGGKFFFYVN  
 BL2 366 YS-----ETCAAIATAFFARRMLEIAPKAEYADVME SALYNTTLAGMALDGGKFFFYVN  
 BLL2 366 YS-----ETCAAIATAFFARRMLEIAPKAEYADVME SALYNTTLAGMALDGGKFFFYVN  
 BP2 327 EG-----PETCNSYNMSKLAERLWLRSGSADYINFYERVLENHLLSTINPKQPGFVYFT  
 BLL4 436 -GKRN---AESCAAYNMLKVARYLFFTEQKPAYMDYYERTILNHILGGKSRDLDSGTALT  
 BLL3 714 GGYRNFSTVETCNEYNMLKLARILFQVTKDSKYSEYYEHTFINATVASONPETGMTTYFQ

Fig. S1a

BL1 389 ALETTDPDGLD-NPDRHHVLSHRVDWFGCA-----CCPANIARLIASVDRIYTER-----  
 BI1 389 ALETTDPDGLD-NPDRHHVLSHRVDWFGCA-----CCPANIARLIASVDRIYTER-----  
 BLL1 389 ALETTDPDGLD-NPDRHHVLSHRVDWFGCA-----CCPANIARLIASVDRIYTER-----  
 BB 361 ALETTDPDGLA-NPDRHHVLSHRVDWFGCA-----CCPTNIAQLIASVDRIYTER-----  
 BD1 389 ALESTPDGLD-NPDRHHVLSHRVDWFGCA-----CCPANIARLIASVDRIYTER-----  
 BP1 389 ALETSPDGLD-NPDRHHVLSHRVDWFGCA-----CCPANVARLIASVDRIYTER-----  
 BC1 389 ALETSPDGSD-NPDRHHVLSHRVDWFGCA-----CCPANVARLIASVDRIYTER-----  
 BAn 400 PLEADVQATENNPDRRHVLLERAQWFGCA-----CCPSNIARLIASVDRIYTER-----  
 BC3 395 PLEADPAASKGNPTKAHLLTRRAGWEDCA-----CCPANLGRLLTSLDQYLYTVS-----  
 BD2 419 PLEVVPEACHRDERKEHVKPVRQKWFCA-----CCPPNIARMVESVQOYAYTVA-----  
 BC2 425 PLEVVPEACHRDERKEHVKPVRQKWFCA-----CCPPNIARMVESVQOYAYTVA-----  
 BAd 418 PLEVVPEACHRDERKAHVKPVRQKWFCA-----CCPPNIARIVEDVQOYAYTIG-----  
 BI2 419 PLEVNEYACHKDSRLRHVKPVRQKWFCA-----CCPPNIARIVESVQOYAYTVA-----  
 BL2 419 PLEVNEYACHKDSRLRHVKPVRQKWFCA-----CCPPNIARIVESVQOYAYTVA-----  
 BLL2 419 PLEVNEYACHKDSRLRHVKPVRQKWFCA-----CCPPNIARIVESVQOYAYTVA-----  
 BP2 381 PMRSQHYRAYSTPEQECF-----W-----CCVSGLENHARYGRLLIYALQRPAAQ  
 BLL4 492 PGNCYMPVNPATQKEY-----GDGNICT-----CCGGTALESHSKYQDSIYFHS-----  
 BLL3 774 PMKAGYPKVFGITGTDY-----DADWFGGAIGEYWCCTGTGIENFAKLNDSFYF-----

BL1 438 -----DGGKTVLSSHQFIAN--KADF--ASGLTVEQR---S  
 BI1 438 -----DGGKIVLSSHQFIAN--KADF--ASGLTVEQR---S  
 BLL1 438 -----DGGKTVLSSHQFIAN--TAEF--ASGLTVEQR---S  
 BB 410 -----DGGKTVLSSHQFIIN--KAEF--ASGLTVEQR---S  
 BD1 438 -----DGGKTVLSSHQFIAN--EATF--DSGLYVVQR---S  
 BP1 438 -----DGGRTVLAHQFIAN--QASF--DSGLHVEQR---S  
 BC1 438 -----DGGRTVLAHQFIAN--QASF--DSGLHVEQR---S  
 BAn 450 -----EDERMIAAHQFIAN--DAEF--FDDVRVKQE---S  
 BC3 445 -----NDGKTVYAHQFVAN--KTEF--EDGFTIEQTQAGD  
 BD2 469 -----DDASTLYVHLYMGGVVS AKLGGSDVSLEVR---A  
 BC2 475 -----DDASTLYVHLYMGGVVS AKLGGSDVSLEVR---A  
 BAd 468 -----DSSSTLYVHLYMGGVHARLSGTDVRLDVM---S  
 BI2 469 -----EDGGTLFTHLYMGGVAKAELNGTAVELDVT---A  
 BL2 469 -----EDGGTLFTHLYMGGVAKAELNGTAVELDVT---A  
 BLL2 469 -----EDGGTLFTHLYMGGVAKAELNGTAVELDVT---A  
 BP2 425 DSADSAAAGFASSAAETGNTVSNNAEAETRLLVNLVIDS--TFDCPEQCLRTTORAARI  
 BLL4 537 -----TDNKELYVNLFTAS--TLDWTDITGLKIAQE---T  
 BLL3 823 -----TDENNVYVNMFWSS--TYTDTRHNLITITQT---A

BL1 466 DFPWDSHVEYTVSLPASA-----ADSSVRFGLRIPGW--SLGS----YTTLTVNGKPAVG  
 BI1 466 DFPWDSHVEYTVSLPASA-----ADSSVRFGLRIPGW--SLGS----YTTLTVNGKPAVG  
 BLL1 466 NFPWDGHVEYTVSLPASA-----TDSSVRFGLRIPGW--SRGS----YTTLTVNGKPAVG  
 BB 438 DFPWNCHVEYTVSLPASA-----TDSSVRFGLRIPGW--SLGS----YALTVNGKSAVA  
 BD1 466 DMPWSGHVEFEVNLAEGA-----QPVRFGVRIPSW--SANA----YALAVDGEPECK  
 BP1 466 DFPWNCHIEYMVELPAEA-----AD-SVRFVRIPTW--SADS----YALTCDGVAVKT  
 BC1 466 DFPWNCHIEYMVELPAEA-----AD-SVRFVRIPTW--SADS----YALTCDGVAVKT  
 BAn 478 DFPRECVVRFVTVDVPEGA-----DPVIEKVRIPSW--SPE----YRLTVDGVDTVG  
 BC3 476 EYPWSCDLTFHVSNEGL-----DKKVAVRIPQW--SKD----YTLEVNGEAVEL  
 BD2 500 GMPWNGAGAITVTLPESSD---EGQVPEPFALALRIPAW--AGGESAA-DSIHAAGEKDSR  
 BC2 506 GMPWNGAGAITVTLPESSD---EGQVPESFALALRIPAW--AGGESAA-DSIHATGEKDSR  
 BAd 499 DMPWSCKGSAVGFDAAGDSASDASKDAVFTIALRIPAW--AGGETAS-DAVTVRGRDDIS  
 BI2 500 NLPWYGDGKAVVRLGNDAAAGASAQAPARFTLAERLIPGW--VGEESAAAAAITATGEPESG  
 BL2 500 NLPWQGDGKAVVRLGDDAAGTSAQAPARFTLAERLIPGW--VGDESAAAAAITATGESESG  
 BLL2 500 NLPWQGDGKAVVRLGDDAAGTSAQAPARFTLAERLIPGW--VGDESAAAAAITATGESESG  
 BP2 483 EDGVDYTVTFITLESTAEHVPDTPGGLRETTFLFRPWWAEHYGVMEATCAVCTLDPARTN  
 BLL4 566 NYPEEETSTISITAAPKS-----AVTERIRIPAW--SKG----AKIEVNGKAIDG  
 BLL3 852 NVPKTEDVTFEVSGETCSA-----NLKLRVPDWAITNG-----VKLVVDGTEQAL

Fig. S1b
